# Supplementary material for: A combined IR/IR and IR/UV spectroscopy study on the proton transfer coordinate of isolated 3-hydroxychromone in the electronic ground and excited state
Source: Royal Society of Chemistry journal article supplement (doi:10.1039/c4cp02546f), 2014-08-19
Supplement: c4cp02546f1.pdf [file c4cp02546f1.pdf]

## **Supporting Information for**

Combined IR/IR and IR/UV spectroscopy on the proton transfer coordinate of isolated 3-hydroxychromone in the electronic ground and excited state

*A. Stamm,<sup>a</sup> M. Weiler,<sup>a</sup> A. Brächer,<sup>a</sup> K. Schwing,<sup>a</sup> M. Gerhards\*,<sup>a</sup>*

<sup>a</sup>TU Kaiserslautern, Fachbereich Chemie & Research Center Optimas, Erwin-Schroedinger-Straße 52, D-67663 Kaiserslautern, Germany.

## **Content**

### **a) ESPT scheme for the 3-HC monomer**

### **b) Monohydrate in the S<sub>0</sub> state**

- Possible structures of 3-HC with one water molecule
- Geometry parameters obtained for 3-HC(H<sub>2</sub>O)<sub>1</sub> clusters in the S<sub>0</sub> state
- Comparison of calculated vs. Experimental spectra in the S<sub>0</sub> state

### **c) Monohydrate in the S<sub>1</sub> state**

- Geometry parameters obtained for 3-HC(H<sub>2</sub>O)<sub>1</sub> clusters in the S<sub>1</sub> state
- Comparison of the experimental S<sub>1</sub> state spectrum to results from calculations

### **d) Dihydrate in the S<sub>0</sub> state**

- Possible structures of the 3-HC with two water molecules
- Geometry parameters obtained for the possible dihydrate clusters of 3-HC in the S<sub>0</sub> state
- Comparison of the experimental S<sub>0</sub> state spectrum to results from calculations

### **e) 3-Hydroxychromone under neon expansion**

### **f) Synthesis of 3-hydroxychromone**

### **g) Description of the vibrational bands obtained for the types *A*, *B*, *A<sub>trans</sub>* and *B<sup>′</sup>T* of 3-HC with one water**

### **h) Resonance structures of the tautomeric structure of 3-HC**

a) ESPT scheme for the 3-HC monomer

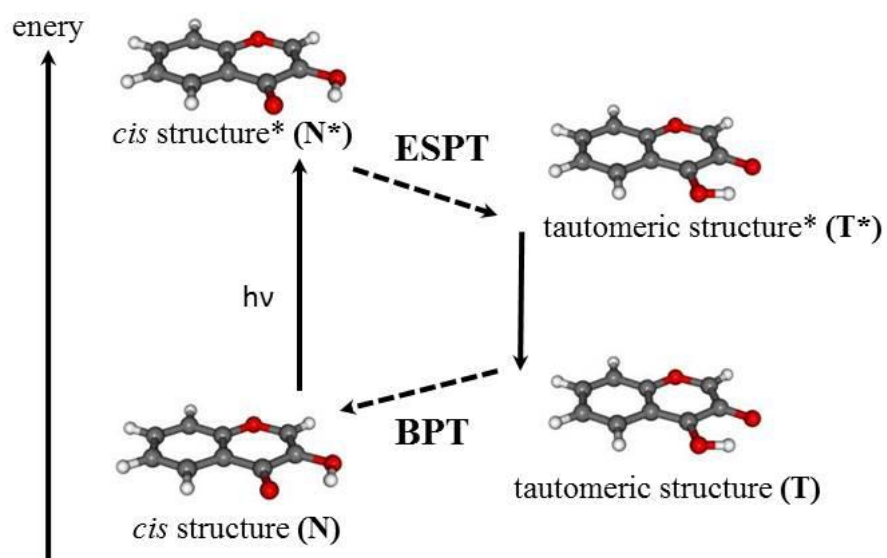

**Figure S1** Typical scheme of a proton transfer after electronic excitation.  
(ESPT = Excited state proton transfer, BPT = Back proton transfer)

## b) Monohydrate in the S<sub>0</sub> state

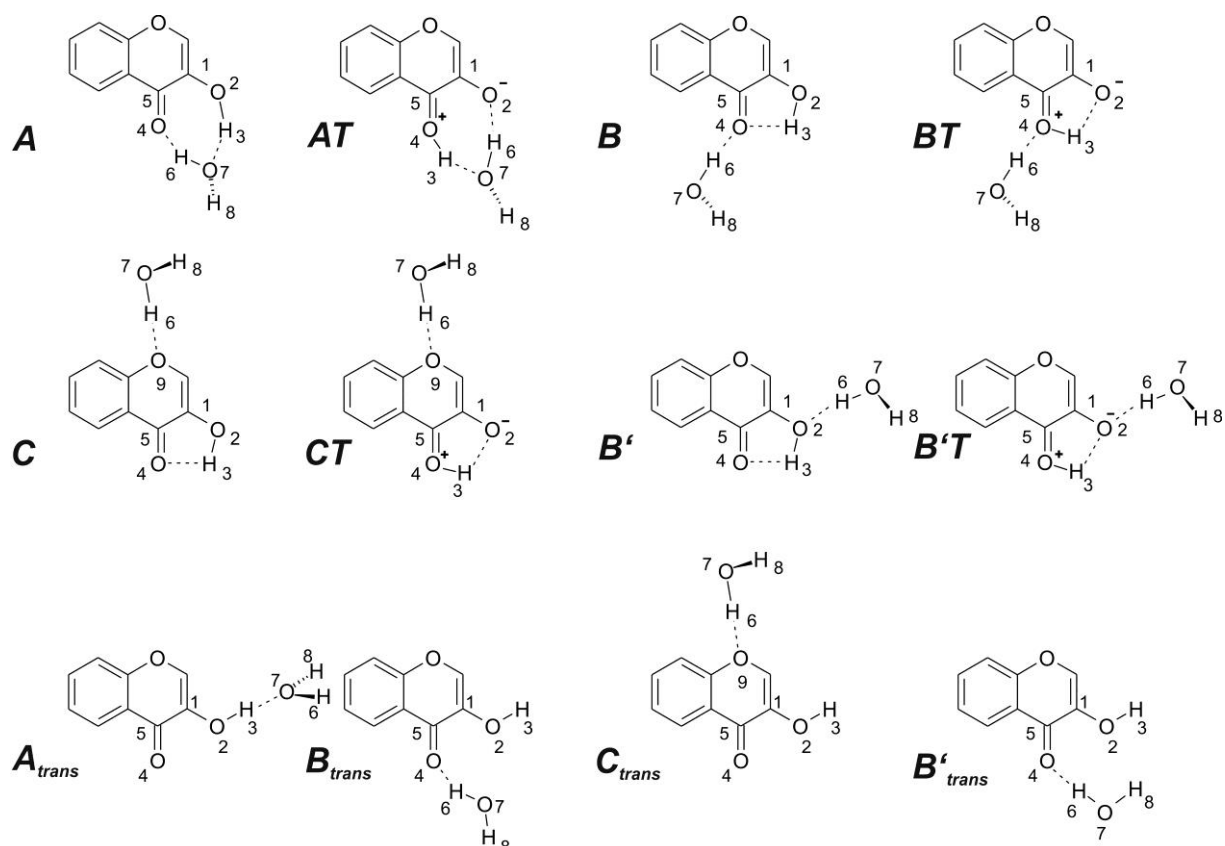

**Figure S2** Possible structures of 3-hydroxycromone with one water molecule.

**Table S1** Geometry parameters obtained for *A*, *B*, *C*, *B'*, *AT*, *BT*, *CT*, *B'T* and *A<sub>trans</sub>*, *B<sub>trans</sub>*, *C<sub>trans</sub>*, *B'<sub>trans</sub>* type structures (*cf.* Figure S2) of the 3-HC(H<sub>2</sub>O)<sub>1</sub> cluster in the S<sub>0</sub> state calculated at the DFT (B3LYP/TZVP) level of theory. The bond lengths are given in Å and the bond angles in degree.

|                              | <i>A</i>                                     | <i>B</i>                                       | <i>C</i>                                        | <i>B'</i>                                       |
|------------------------------|----------------------------------------------|------------------------------------------------|-------------------------------------------------|-------------------------------------------------|
|                              | <i>E<sub>rel</sub></i> (cm <sup>-1</sup> ) 0 | <i>E<sub>rel</sub></i> (cm <sup>-1</sup> ) 839 | <i>E<sub>rel</sub></i> (cm <sup>-1</sup> ) 2070 | <i>E<sub>rel</sub></i> (cm <sup>-1</sup> ) 1312 |
| <i>r</i> <sub>C1-O2</sub>    | 1.342                                        | <i>r</i> <sub>C1-O2</sub> 1.351                | <i>r</i> <sub>C1-O2</sub> 1.350                 | <i>r</i> <sub>C1-O2</sub> 1.361                 |
| <i>r</i> <sub>O2-H3</sub>    | 0.953                                        | <i>r</i> <sub>O2-H3</sub> 0.975                | <i>r</i> <sub>O2-H3</sub> 0.976                 | <i>r</i> <sub>O2-H3</sub> 0.977                 |
| <i>r</i> <sub>H3-O7</sub>    | 1.913                                        | <i>r</i> <sub>H3-O4</sub> 2.085                | <i>r</i> <sub>H3-O4</sub> 2.096                 | <i>r</i> <sub>O2-H6</sub> 2.013                 |
| <i>r</i> <sub>H6-O7</sub>    | 0.948                                        | <i>r</i> <sub>O4-C5</sub> 1.241                | <i>r</i> <sub>H6-O7</sub> 0.966                 | <i>r</i> <sub>H3-O4</sub> 2.068                 |
| <i>r</i> <sub>O4-H6</sub>    | 2.022                                        | <i>r</i> <sub>O4-H6</sub> 1.899                | <i>r</i> <sub>H6-O9</sub> 2.130                 | <i>r</i> <sub>O4-C5</sub> 1.234                 |
| <i>r</i> <sub>O4-C5</sub>    | 1.211                                        | <i>r</i> <sub>H6-O7</sub> 0.973                | <i>r</i> <sub>O4-C5</sub> 1.231                 | <i>r</i> <sub>H6-O7</sub> 0.968                 |
| <i>Φ</i> <sub>C1-O2-H3</sub> | 112.6                                        | <i>Φ</i> <sub>C1-O2-H3</sub> 105.2             | <i>Φ</i> <sub>C1-O2-H3</sub> 105.1              | <i>Φ</i> <sub>C1-O2-H3</sub> 104.8              |
| <i>Φ</i> <sub>O2-H3-O7</sub> | 169.0                                        | <i>Φ</i> <sub>O2-H3-O4</sub> 116.2             | <i>Φ</i> <sub>O2-H3-O4</sub> 116.3              | <i>Φ</i> <sub>O2-H3-O4</sub> 117.1              |
| <i>Φ</i> <sub>H3-O7-H6</sub> | 79.6                                         | <i>Φ</i> <sub>H3-O4-H6</sub> 144.0             | <i>Φ</i> <sub>H3-O4-C5</sub> 82.6               | <i>Φ</i> <sub>C1-O2-H6</sub> 113.0              |
| <i>Φ</i> <sub>O7-H6-O4</sub> | 137.5                                        | <i>Φ</i> <sub>O7-H6-O4</sub> 167.1             | <i>Φ</i> <sub>O7-H6-O9</sub> 156.4              | <i>Φ</i> <sub>O2-H6-O7</sub> 149.0              |
| <i>Φ</i> <sub>H6-O4-C5</sub> | 138.6                                        |                                                |                                                 | <i>Φ</i> <sub>H3-O2-H6</sub> 142.2              |

| <i>AT</i>                         |       | <i>BT</i>                         |       | <i>CT</i>                         |       | <i>B'T</i>                        |       |
|-----------------------------------|-------|-----------------------------------|-------|-----------------------------------|-------|-----------------------------------|-------|
| $E_{\text{rel}} (\text{cm}^{-1})$ | 4382  | $E_{\text{rel}} (\text{cm}^{-1})$ | 6938  | $E_{\text{rel}} (\text{cm}^{-1})$ | 7552  | $E_{\text{rel}} (\text{cm}^{-1})$ | 5484  |
| $r_{\text{C1-O2}}$                | 1.273 | $r_{\text{C1-O2}}$                | 1.270 | $r_{\text{C1-O2}}$                | 1.265 | $r_{\text{C1-O2}}$                | 1.277 |
| $r_{\text{O2-H6}}$                | 1.608 | $r_{\text{O2-H3}}$                | 1.701 | $r_{\text{O2-H3}}$                | 1.801 | $r_{\text{O2-H3}}$                | 1.867 |
| $r_{\text{H6-O7}}$                | 1.006 | $r_{\text{H3-O4}}$                | 1.025 | $r_{\text{H3-O4}}$                | 1.009 | $r_{\text{O2-H6}}$                | 1.818 |
| $r_{\text{H3-O7}}$                | 1.557 | $r_{\text{O4-C5}}$                | 1.317 | $r_{\text{H6-O7}}$                | 0.965 | $r_{\text{H3-O4}}$                | 0.999 |
| $r_{\text{H3-O4}}$                | 1.022 | $r_{\text{H6-O4}}$                | 2.041 | $r_{\text{H6-O9}}$                | 2.243 | $r_{\text{O4-C5}}$                | 1.316 |
| $r_{\text{O4-C5}}$                | 1.308 | $r_{\text{H6-O7}}$                | 0.967 | $r_{\text{O4-C5}}$                | 1.310 | $r_{\text{H6-O7}}$                | 0.981 |
| $\Phi_{\text{C1-O2-H6}}$          | 122.4 | $\Phi_{\text{C1-O2-H3}}$          | 85.2  | $\Phi_{\text{C1-O2-H3}}$          | 84.3  | $\Phi_{\text{C1-O2-H3}}$          | 83.7  |
| $\Phi_{\text{O2-H6-O7}}$          | 156.0 | $\Phi_{\text{O2-H3-O4}}$          | 128.7 | $\Phi_{\text{O2-H3-O4}}$          | 125.5 | $\Phi_{\text{O2-H3-O4}}$          | 123.1 |
| $\Phi_{\text{H6-O7-H3}}$          | 84.4  | $\Phi_{\text{H3-O4-H6}}$          | 128.7 | $\Phi_{\text{H3-O4-C5}}$          | 101.0 | $\Phi_{\text{C1-O2-H6}}$          | 108.2 |
| $\Phi_{\text{O7-H3-O4}}$          | 174.6 | $\Phi_{\text{O7-H6-O4}}$          | 157.1 | $\Phi_{\text{O7-H6-O9}}$          | 144.1 | $\Phi_{\text{O2-H6-O7}}$          | 159.7 |
| $\Phi_{\text{H3-O4-C5}}$          | 115.2 |                                   |       |                                   |       | $\Phi_{\text{H3-O2-H6}}$          | 168.0 |

| <i>A<sub>trans</sub></i>          |       | <i>B<sub>trans</sub></i>          |       | <i>C<sub>trans</sub></i>          |       | <i>B'<sub>trans</sub></i>         |       |
|-----------------------------------|-------|-----------------------------------|-------|-----------------------------------|-------|-----------------------------------|-------|
| $E_{\text{rel}} (\text{cm}^{-1})$ | 3107  | $E_{\text{rel}} (\text{cm}^{-1})$ | 3807  | $E_{\text{rel}} (\text{cm}^{-1})$ | 5003  | $E_{\text{rel}} (\text{cm}^{-1})$ | 3829  |
| $r_{\text{C1-O2}}$                | 1.351 | $r_{\text{C1-O2}}$                | 1.356 | $r_{\text{C1-O2}}$                | 1.358 | $r_{\text{C1-O2}}$                | 1.362 |
| $r_{\text{O2-H3}}$                | 0.976 | $r_{\text{O2-H3}}$                | 0.964 | $r_{\text{O2-H3}}$                | 0.965 | $r_{\text{O2-H3}}$                | 0.965 |
| $r_{\text{O4-C5}}$                | 1.221 | $r_{\text{O4-C5}}$                | 1.226 | $r_{\text{O4-C5}}$                | 1.219 | $r_{\text{O4-C5}}$                | 1.225 |
| $r_{\text{H3-O7}}$                | 1.840 | $r_{\text{O4-H6}}$                | 2.059 | $r_{\text{H6-O7}}$                | 0.966 | $r_{\text{O4-H6}}$                | 1.979 |
| $r_{\text{H6-O7}}$                | 0.964 | $r_{\text{H6-O7}}$                | 0.970 | $r_{\text{H6-O9}}$                | 2.070 | $r_{\text{H6-O7}}$                | 0.970 |
| $\Phi_{\text{C1-O2-H3}}$          | 110.9 | $\Phi_{\text{C1-O2-H3}}$          | 111.7 | $\Phi_{\text{C1-O2-H3}}$          | 110.6 | $\Phi_{\text{C1-O2-H3}}$          | 110.5 |
| $\Phi_{\text{O2-H3-O7}}$          | 178.2 | $\Phi_{\text{C5-O4-H6}}$          | 125.3 | $\Phi_{\text{O9-H6-O7}}$          | 170.9 | $\Phi_{\text{C5-O4-H6}}$          | 134.4 |
| $\Phi_{\text{H3-O7-H6}}$          | 116.2 | $\Phi_{\text{O4-H6-O7}}$          | 159.5 |                                   |       | $\Phi_{\text{O4-H6-O7}}$          | 170.7 |

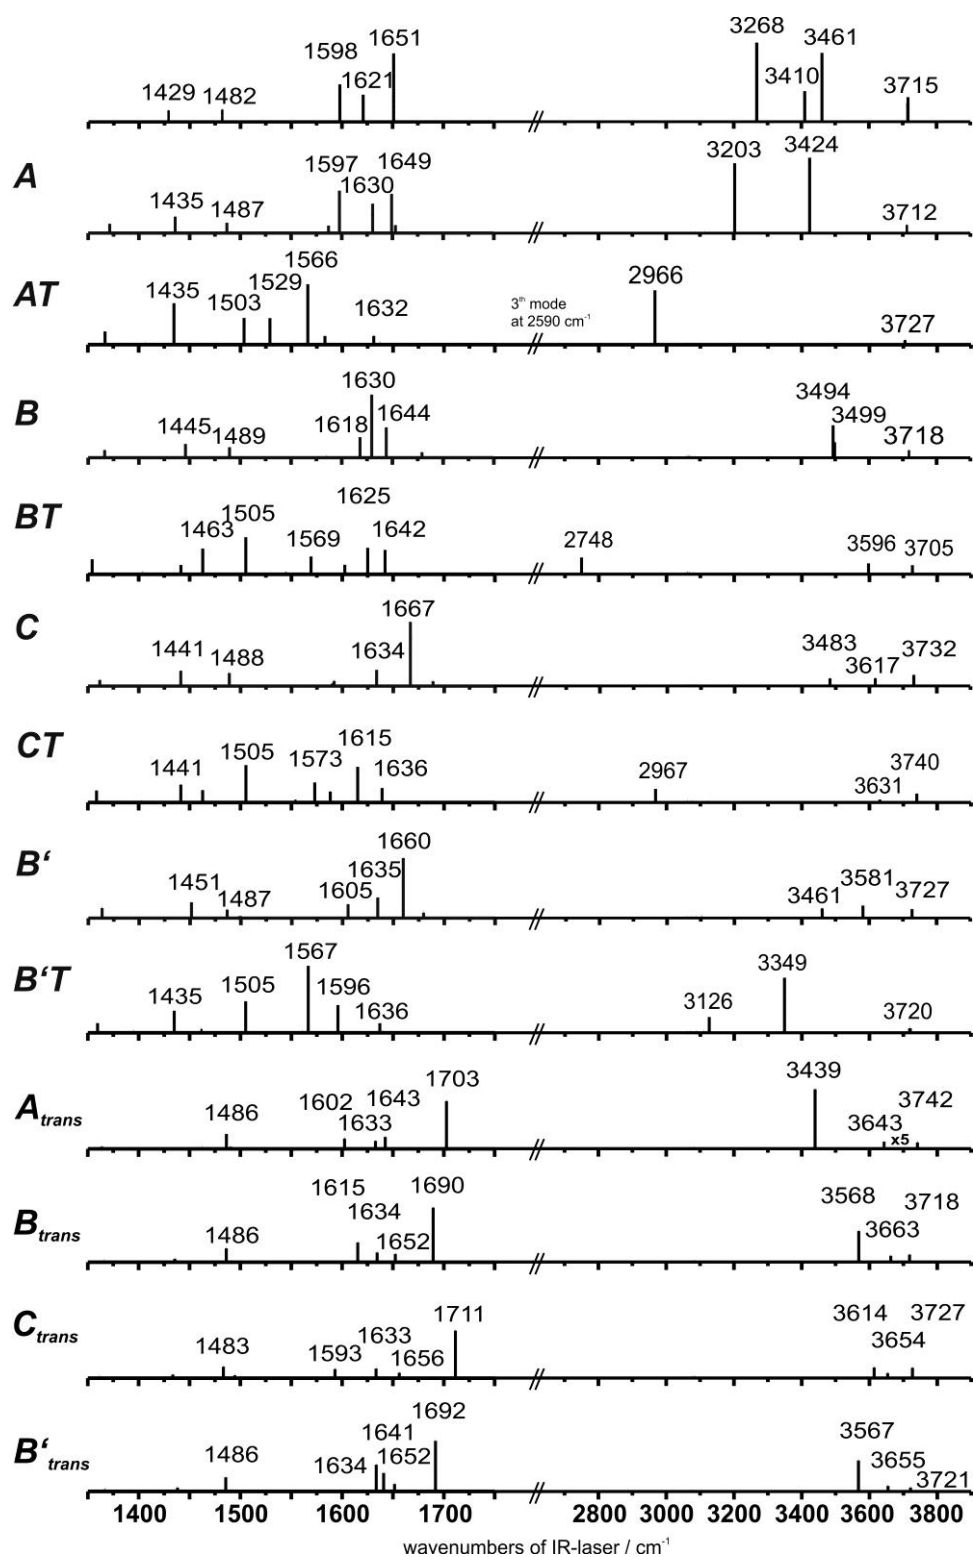

**Figure S3** The upper trace schematically depicts the experimental  $S_0$  state spectrum *via* the ion signal of 3-hydroxychromone, which is compared to the calculated stick spectra of different monohydrate isomers (DFT/B3LYP/TZVP, scaling factor OH stretching region: 0.9613; scaling factor CO stretching/OH bending region: 0.99. For a better illustration the calculated intensities in the OH stretching region were doubled.)

### c) Monohydrate in the $S_1$ state

**Table S2** Geometry parameters obtained for  $A$ ,  $B$ ,  $C$ ,  $B'$ ,  $AT$ ,  $BT$ ,  $CT$ ,  $B'T$  and  $A_{trans}$ ,  $C_{trans}$  type structures of the 3-HC(H<sub>2</sub>O)<sub>1</sub> cluster in the  $S_1$  state calculated at the TD-DFT (B3LYP/TZVP) level of theory. The bond lengths are given in Å and the bond angles in degree.

| $A$                                |       | $B$                                |       | $C$                                |       | $B'$                               |       |
|------------------------------------|-------|------------------------------------|-------|------------------------------------|-------|------------------------------------|-------|
| $E_{rel}$ (cm <sup>-1</sup> ) 3880 |       | $E_{rel}$ (cm <sup>-1</sup> ) 5158 |       | $E_{rel}$ (cm <sup>-1</sup> ) 6248 |       | $E_{rel}$ (cm <sup>-1</sup> ) 5804 |       |
| $r_{C1-O2}$                        | 1.356 | $r_{C1-O2}$                        | 1.323 | $r_{C1-O2}$                        | 1.368 | $r_{C1-O2}$                        | 1.380 |
| $r_{O2-H3}$                        | 0.981 | $r_{O2-H3}$                        | 0.999 | $r_{O2-H3}$                        | 0.964 | $r_{O2-H3}$                        | 0.965 |
| $r_{H3-O7}$                        | 1.794 | $r_{H3-O4}$                        | 1.880 | $r_{H3-O4}$                        | 2.429 | $r_{O2-H6}$                        | 2.019 |
| $r_{H6-O7}$                        | 0.973 | $r_{O4-C5}$                        | 1.261 | $r_{H6-O7}$                        | 0.966 | $r_{H3-O4}$                        | 2.477 |
| $r_{O4-H6}$                        | 1.908 | $r_{O4-H6}$                        | 1.891 | $r_{H6-O9}$                        | 2.071 | $r_{O4-C5}$                        | 1.329 |
| $r_{O4-C5}$                        | 1.339 | $r_{H6-O7}$                        | 0.974 | $r_{O4-C5}$                        | 1.329 | $r_{H6-O7}$                        | 0.968 |
| $\Phi_{C1-O2-H3}$                  | 111.4 | $\Phi_{C1-O2-H3}$                  | 102.6 | $\Phi_{C1-O2-H3}$                  | 110.3 | $\Phi_{C1-O2-H3}$                  | 110.1 |
| $\Phi_{O2-H3-O7}$                  | 171.5 | $\Phi_{O2-H3-O4}$                  | 123.0 | $\Phi_{O2-H3-O4}$                  | 102.9 | $\Phi_{O2-H3-O4}$                  | 98.9  |
| $\Phi_{H3-O7-H6}$                  | 99.4  | $\Phi_{H3-O4-H6}$                  | 145.4 | $\Phi_{H3-O4-C5}$                  | 78.0  | $\Phi_{C1-O2-H6}$                  | 114.5 |
| $\Phi_{O7-H6-O4}$                  | 127.7 | $\Phi_{O7-H6-O4}$                  | 169.9 | $\Phi_{O7-H6-O9}$                  | 168.5 | $\Phi_{O2-H6-O7}$                  | 155.7 |
| $\Phi_{H6-O4-C5}$                  | 121.9 |                                    |       |                                    |       | $\Phi_{H3-O2-H6}$                  | 126.2 |

| $AT$                            |       | $BT$                               |       | $CT$                               |       | $B'T$                              |       |
|---------------------------------|-------|------------------------------------|-------|------------------------------------|-------|------------------------------------|-------|
| $E_{rel}$ (cm <sup>-1</sup> ) 0 |       | $E_{rel}$ (cm <sup>-1</sup> ) 1959 |       | $E_{rel}$ (cm <sup>-1</sup> ) 2250 |       | $E_{rel}$ (cm <sup>-1</sup> ) 1361 |       |
| $r_{C1-O2}$                     | 1.339 | $r_{C1-O2}$                        | 1.335 | $r_{C1-O2}$                        | 1.344 | $r_{C1-O2}$                        | 1.337 |
| $r_{O2-H6}$                     | 1.881 | $r_{O2-H3}$                        | 2.091 | $r_{O2-H3}$                        | 2.209 | $r_{O2-H3}$                        | 2.153 |
| $r_{H6-O7}$                     | 0.974 | $r_{H3-O4}$                        | 0.976 | $r_{H3-O4}$                        | 0.969 | $r_{O2-H6}$                        | 1.956 |
| $r_{H3-O7}$                     | 1.708 | $r_{O4-C5}$                        | 1.351 | $r_{H6-O7}$                        | 0.966 | $r_{H3-O4}$                        | 0.974 |
| $r_{H3-O4}$                     | 0.992 | $r_{O4-H6}$                        | 2.033 | $r_{H6-O9}$                        | 2.052 | $r_{O4-C5}$                        | 1.341 |
| $r_{O4-C5}$                     | 1.334 | $r_{H6-O7}$                        | 0.967 | $r_{O4-C5}$                        | 1.329 | $r_{H6-O7}$                        | 0.971 |
| $\Phi_{C1-O2-H6}$               | 126.7 | $\Phi_{C1-O2-H3}$                  | 82.1  | $\Phi_{C1-O2-H3}$                  | 81.2  | $\Phi_{C1-O2-H3}$                  | 81.6  |
| $\Phi_{O2-H6-O7}$               | 142.1 | $\Phi_{O2-H3-O4}$                  | 116.4 | $\Phi_{O2-H3-O4}$                  | 111.3 | $\Phi_{O2-H3-O4}$                  | 114.2 |
| $\Phi_{H6-O7-H3}$               | 89.6  | $\Phi_{H3-O4-H6}$                  | 118.9 | $\Phi_{H3-O4-C5}$                  | 108.5 | $\Phi_{C1-O2-H6}$                  | 111.3 |
| $\Phi_{O7-H3-O4}$               | 177.1 | $\Phi_{O7-H6-O4}$                  | 166.1 | $\Phi_{O7-H6-O9}$                  | 157.5 | $\Phi_{O2-H6-O7}$                  | 157.2 |
| $\Phi_{H3-O4-C5}$               | 114.2 |                                    |       |                                    |       | $\Phi_{H3-O2-H6}$                  | 166.8 |

| $A_{trans}$                        |       | $C_{trans}$                        |       |
|------------------------------------|-------|------------------------------------|-------|
| $E_{rel}$ (cm <sup>-1</sup> ) 4652 |       | $E_{rel}$ (cm <sup>-1</sup> ) 6512 |       |
| $r_{C1-O2}$                        | 1.358 | $r_{C1-O2}$                        | 1.366 |
| $r_{O2-H3}$                        | 0.977 | $r_{O2-H3}$                        | 0.964 |
| $r_{O4-C5}$                        | 1.323 | $r_{O4-C5}$                        | 1.321 |
| $r_{H3-O7}$                        | 1.821 | $r_{H6-O9}$                        | 2.042 |
| $r_{H6-O7}$                        | 0.964 | $r_{H6-O7}$                        | 0.966 |
| $\Phi_{C1-O2-H3}$                  | 110.7 | $\Phi_{C1-O2-H3}$                  | 110.3 |
| $\Phi_{O2-H3-O7}$                  | 178.7 | $\Phi_{O2-H3-O7}$                  | 175.1 |
| $\Phi_{H3-O7-H6}$                  | 117.4 |                                    |       |

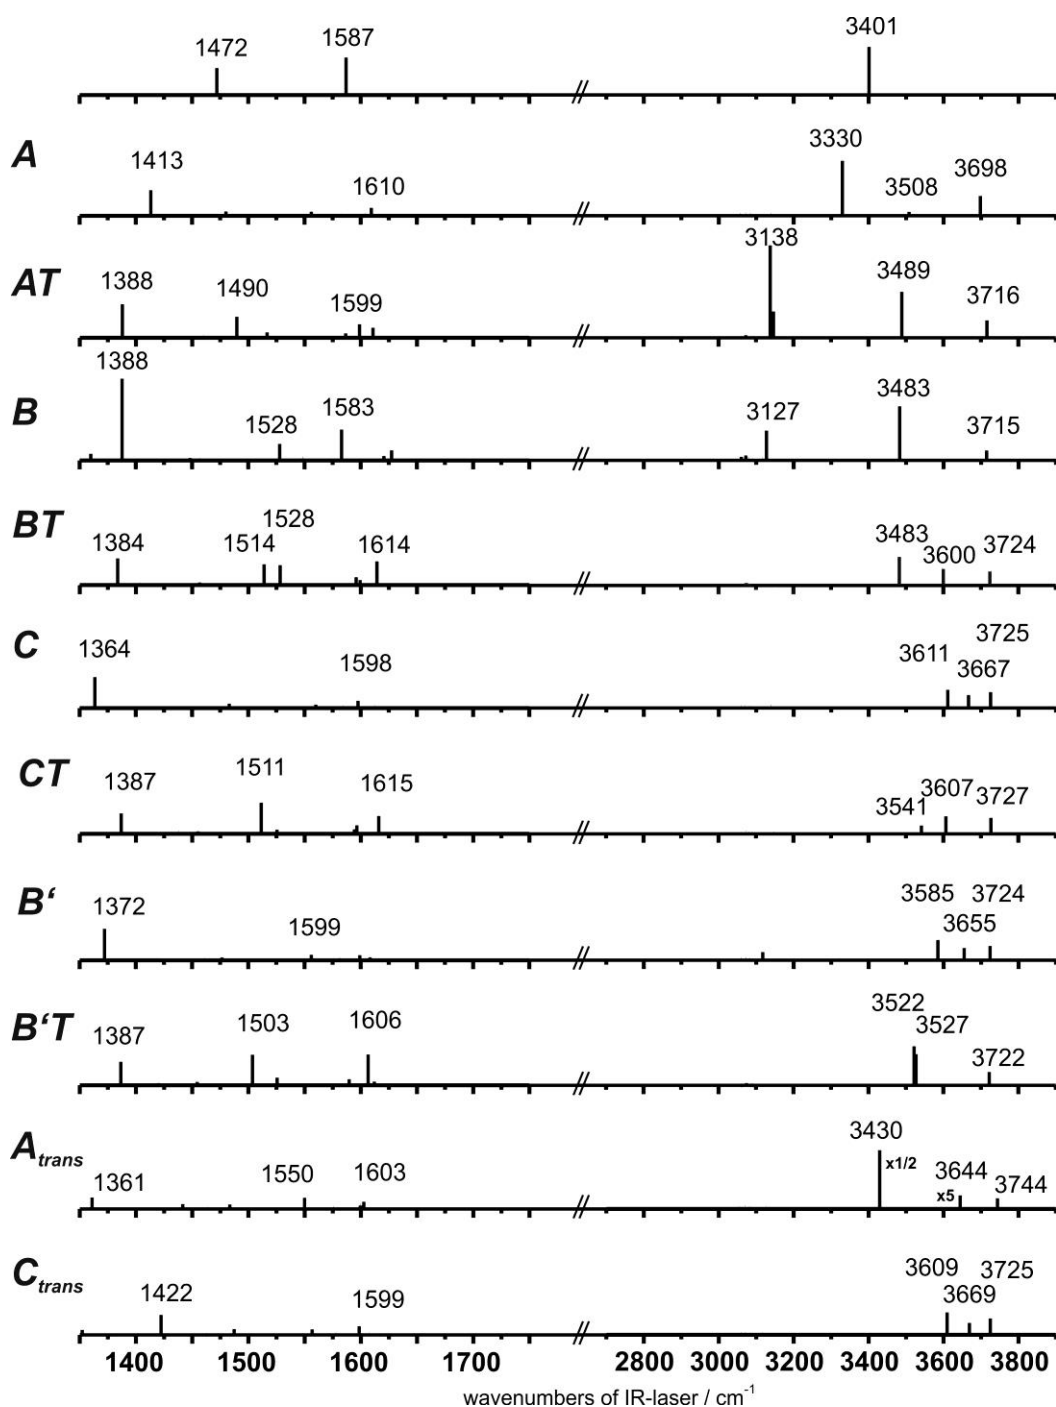

**Figure S4** The upper trace schematically depicts the experimental  $S_1$  state spectrum *via* the ion signal of 3-hydroxychromone, which is compared to the calculated stick spectra of different monohydrate isomers (TD-DFT/B3LYP/TZVP, scaling factor OH stretching region: 0.9613; scaling factor CO stretching/OH bending region: 0.99.)

### d) Dihydrate in the $S_0$ state

Additionally structures for clusters with two water molecules (*cf.* Figure S5) and the corresponding most important geometry parameters have been calculated. In case of the most stable dihydrate structure *I* both water molecules are inserted between the CO and OH functionality acting as a bridge. In structure *D*, being  $1390\text{ cm}^{-1}$  (17 kJ/mol) less stable than *I*, only one water molecule is in a bridging function, the second one is attached to the first one as hydrogen-bonding donor. In structure *E* ( $1005\text{ cm}^{-1}$  (12 kJ/mol) less stable) the first water molecule is inserted and at the same time acts a hydrogen-bonding donor for the second one. The second water molecule can also be bonded to the oxygen atom of the chromone unit resulting in an even less stable structure (*F*:  $2028\text{ cm}^{-1}$  (24 kJ/mol)). For the *I* and *D* structure the tautomeric forms *IT* and *DT* were also calculated which are significantly less stable in the electronic ground state (*IT*:  $4315\text{ cm}^{-1}$  (52 kJ/mol), *DT*:  $5519\text{ cm}^{-1}$  (66 kJ/mol)).

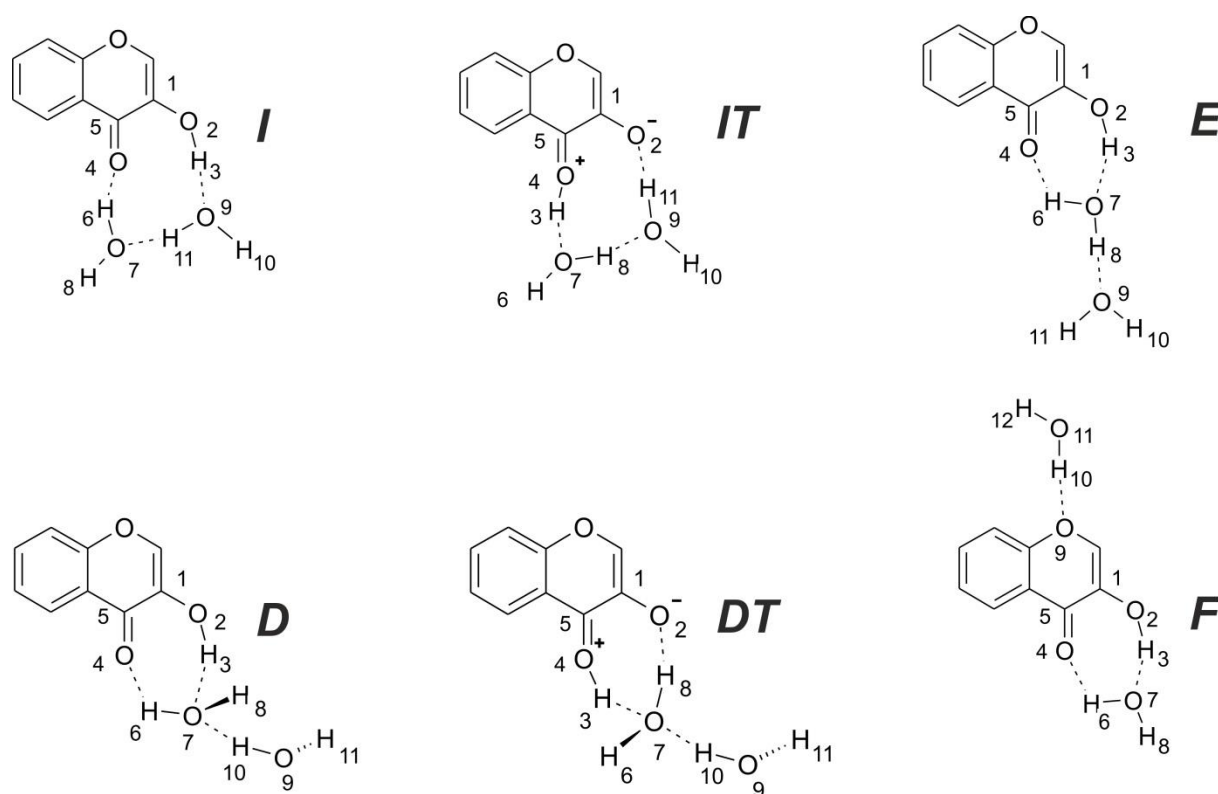

**Figure S5** Possible structures of 3-hydroxychromone with two water molecules.



**Table S3** Geometry parameters obtained for *I*, *IT*, *E*, *D*, *DT* and *F* type structures of the 3-HC(H<sub>2</sub>O)<sub>2</sub> cluster in the S<sub>0</sub> state calculated at the DFT (B3LYP/TZVP) level of theory. The bond lengths are given in Å and the bond angles in degree.

| <i>I</i>                               |       | <i>IT</i>                                 |       | <i>E</i>                                  |       |
|----------------------------------------|-------|-------------------------------------------|-------|-------------------------------------------|-------|
| E <sub>rel</sub> (cm <sup>-1</sup> ) 0 |       | E <sub>rel</sub> (cm <sup>-1</sup> ) 4315 |       | E <sub>rel</sub> (cm <sup>-1</sup> ) 1005 |       |
| r <sub>C1-O2</sub>                     | 1.339 | r <sub>C1-O2</sub>                        | 1.267 | r <sub>C1-O2</sub>                        | 1.343 |
| r <sub>O2-H3</sub>                     | 0.993 | r <sub>O2-H11</sub>                       | 1.685 | r <sub>O2-H3</sub>                        | 0.998 |
| r <sub>H3-O9</sub>                     | 1.736 | r <sub>H11-O9</sub>                       | 0.988 | r <sub>H3-O7</sub>                        | 1.675 |
| r <sub>O9-H11</sub>                    | 0.982 | r <sub>O9-H8</sub>                        | 1.711 | r <sub>O7-H6</sub>                        | 0.973 |
| r <sub>H11-O7</sub>                    | 1.779 | r <sub>H8-O7</sub>                        | 0.990 | r <sub>H6-O4</sub>                        | 1.924 |
| r <sub>O7-H6</sub>                     | 0.975 | r <sub>O7-H3</sub>                        | 1.608 | r <sub>O4-C5</sub>                        | 1.236 |
| r <sub>H6-O4</sub>                     | 1.818 | r <sub>H3-O4</sub>                        | 1.019 | r <sub>H8-O9</sub>                        | 1.887 |
| r <sub>O4-C5</sub>                     | 1.236 | r <sub>O4-C5</sub>                        | 1.303 | Φ <sub>C1-O2-H3</sub>                     | 113.8 |
| Φ <sub>C1-O2-H3</sub>                  | 114.9 | Φ <sub>C1-O2-H11</sub>                    | 147.5 | Φ <sub>O2-H3-O7</sub>                     | 179.4 |
| Φ <sub>O2-H3-O9</sub>                  | 158.8 | Φ <sub>O2-H11-O9</sub>                    | 161.0 | Φ <sub>H3-O4-H6</sub>                     | 88.5  |
| Φ <sub>H3-O9-H11</sub>                 | 112.2 | Φ <sub>H11-O9-H8</sub>                    | 90.3  | Φ <sub>O7-H6-O4</sub>                     | 141.7 |
| Φ <sub>O9-H11-O7</sub>                 | 163.9 | Φ <sub>O9-H8-O7</sub>                     | 164.8 | Φ <sub>H6-O4-C5</sub>                     | 127.8 |
| Φ <sub>H11-O7-H6</sub>                 | 90.4  | Φ <sub>H8-O7-H3</sub>                     | 107.3 | Φ <sub>H3-O7-H8</sub>                     | 117.8 |

  

| <i>D</i>                                  |       | <i>DT</i>                                 |       | <i>F</i>                                  |       |
|-------------------------------------------|-------|-------------------------------------------|-------|-------------------------------------------|-------|
| E <sub>rel</sub> (cm <sup>-1</sup> ) 1390 |       | E <sub>rel</sub> (cm <sup>-1</sup> ) 5519 |       | E <sub>rel</sub> (cm <sup>-1</sup> ) 2028 |       |
| r <sub>C1-O2</sub>                        | 1.351 | r <sub>C1-O2</sub>                        | 1.277 | r <sub>C1-O2</sub>                        | 1.344 |
| r <sub>O2-H3</sub>                        | 0.982 | r <sub>O2-H8</sub>                        | 1.537 | r <sub>O2-H3</sub>                        | 0.989 |
| r <sub>H3-O7</sub>                        | 1.806 | r <sub>H8-O7</sub>                        | 1.021 | r <sub>H3-O7</sub>                        | 1.736 |
| r <sub>O7-H6</sub>                        | 0.981 | r <sub>O7-H3</sub>                        | 1.616 | r <sub>O7-H6</sub>                        | 0.978 |
| r <sub>H6-O4</sub>                        | 1.791 | r <sub>H3-O4</sub>                        | 1.010 | r <sub>H6-O4</sub>                        | 1.835 |
| r <sub>O4-C5</sub>                        | 1.239 | r <sub>O4-C5</sub>                        | 1.311 | r <sub>O4-C5</sub>                        | 1.237 |
| r <sub>O7-H10</sub>                       | 2.033 | r <sub>O7-H10</sub>                       | 1.925 | r <sub>H10-O9</sub>                       | 2.139 |
| Φ <sub>C1-O2-H3</sub>                     | 112.3 | Φ <sub>C1-O2-H8</sub>                     | 122.4 | Φ <sub>C1-O2-H3</sub>                     | 113.5 |
| Φ <sub>O2-H3-O7</sub>                     | 167.8 | Φ <sub>O2-H8-O7</sub>                     | 160.5 | Φ <sub>O2-H3-O7</sub>                     | 179.6 |
| Φ <sub>H3-O7-H6</sub>                     | 82.0  | Φ <sub>H8-O7-H3</sub>                     | 81.7  | Φ <sub>H3-O7-H6</sub>                     | 85.0  |
| Φ <sub>O7-H6-O4</sub>                     | 149.7 | Φ <sub>O7-H3-O4</sub>                     | 173.5 | Φ <sub>O7-H6-O4</sub>                     | 147.3 |
| Φ <sub>H3-O7-H10</sub>                    | 82.0  | Φ <sub>H8-O7-H10</sub>                    | 120.4 | Φ <sub>H6-O4-C5</sub>                     | 128.5 |
| Φ <sub>O7-H10-O9</sub>                    | 157.0 | Φ <sub>O7-H10-O9</sub>                    | 178.4 | Φ <sub>O11-H10-O9</sub>                   | 155.4 |

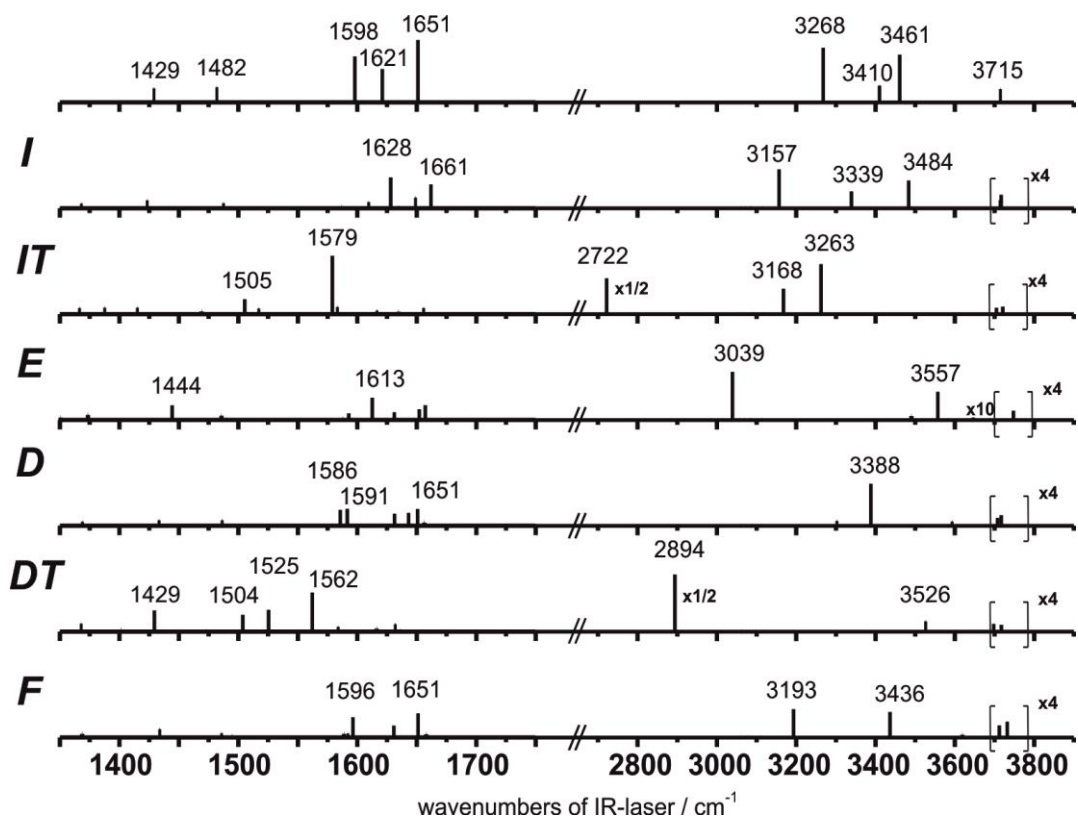

**Figure S6** The upper trace schematically depicts the experimental  $S_0$  state spectrum *via* the ion signal of 3-hydroxychromone, which is compared to the calculated stick spectra of different dihydrate isomers (DFT/B3LYP/TZVP, scaling factor OH stretching region: 0.9613; scaling factor CO stretching/OH bending region: 0.99. For a better illustration the calculated intensities in the OH stretching region were tripled.)

### e) 3-Hydroxychromone under neon expansion

The UV excitation or ionization laser can affect a fragmentation of water clusters down onto the monomer mass trace (or to a mass trace with a lower number of water molecules). As a consequence a certain percentage *e.g.* of the monomer ion signal is not due to the excitation and ionization of the “true” monomer species but originates from fragmenting hydrates. If now IR/R2PI spectra are measured and the IR laser resonantly excites a vibration of a water cluster it depopulates the vibrational ground state of the  $S_0$  state. Therefore less clusters are available for the UV excitation and ionization photon which means that less clusters fragment down onto the monomer mass trace. This leads to a depletion of the monomer mass signal and thus hydrate bands in the IR/R2PI spectrum of the monomer occur.

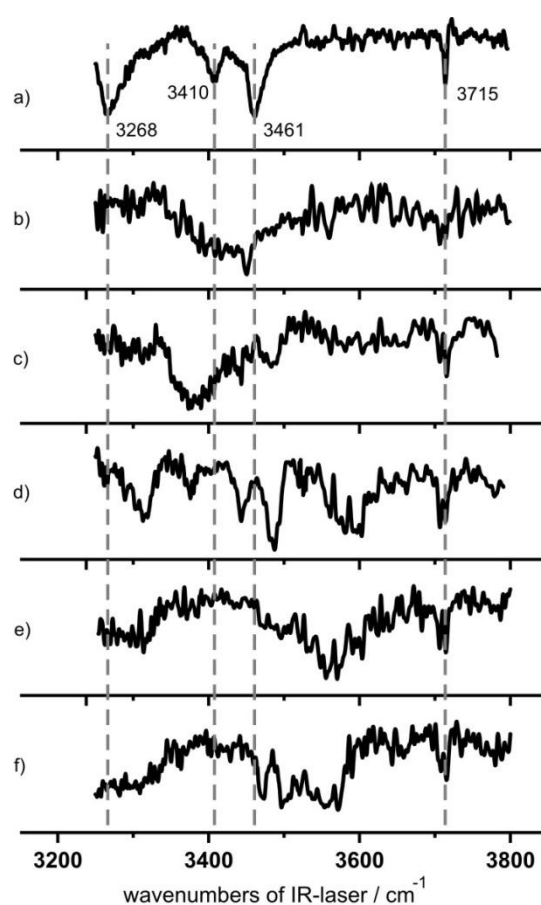

**Figure S7** IR/R2PI spectra (with neon as expansion gas) in the range from 3250 to 3800  $\text{cm}^{-1}$  on the mass traces of a) 3-hydroxychromone b) 3-HC(H<sub>2</sub>O)<sub>1</sub>, c) 3-HC(H<sub>2</sub>O)<sub>2</sub>, d) 3-HC(H<sub>2</sub>O)<sub>3</sub>, e) 3-HC(H<sub>2</sub>O)<sub>4</sub>, f) 3-HC(H<sub>2</sub>O)<sub>5</sub>.

By expanding 3-HC with neon, ion signals of clusters with water could be observed. The corresponding IR/R2PI ( $S_0$  state) spectra obtained in the region from 3250 to 3800 *via* the mass channels of the monomer as well as *via* the mono- up to penta-hydrated clusters are shown in Fig. S7. The IR/R2PI spectra of the monomer mass were identical under helium and neon conditions. However, none of the IR bands in the spectra of the water clusters (in neon) could be correlated with the bands found in the

IR/R2PI spectrum via the monomer mass. This is a clear hint that larger water clusters are formed in the neon expansion, which fragment down onto the mass trace of smaller clusters like the monohydrate but do fragment to the monomer species during dissociation. Two conclusions can be drawn from this: First, the monohydrate mass channel observed in the neon expansion does not represent “true” monohydrate but a fragment of a higher water cluster; second, the additional band in the monomer IR/R2PI spectrum can only originate from the small water clusters like the (non-observable) monohydrate.

### **f) Synthesis of 3-hydroxychromone**

The synthesis consists of two steps. The first step comprises the production of the 2,3-epoxychromone, the second one the synthesis of 3-hydroxychromone. Small changes to the original work from Spadafora *et al.* [1] have been introduced:

A solution of sodium hydroxide (407 mg, 7,5 mmol) and hydrogen peroxide (1,4 ml, 10 mmol, 30 % solution) is slowly added to a solution of chromone (740 mg, 5 mmol) in methylene chloride (7,5 ml). The mixture is stirred for 3 h at 0 °C, quenched with water and extracted with methylene chloride (3 x 30 ml). The organic layers are dried over Na<sub>2</sub>SO<sub>4</sub> and evaporate under reduced pressure to give a crude amorphous solid (583 mg, 71 %).

Concentrated HCl (20 ml) is added to 2,3-epoxychromone (501 mg, 3,1 mmol) and the mixture is heated under reflux at 70 °C for 1 h. After cooling to room temperature, water (20 ml) is added and the mixture is extracted with methylene chlorid (3 x 30 ml). The organic layers are washed with saturated aqueous NaHCO<sub>3</sub> solution, dried over MgSO<sub>4</sub> and evaporated under reduced pressure to give a brown solid. This solid is recrystallized with methanol to give a yellow-brown needle of solid. M(C<sub>9</sub>H<sub>6</sub>O<sub>3</sub>)= 162,1 g/mol. Yield: 410 mg (2,5 mmol, 81 %). Mp: 176,5 °C.

[1] M. Spadafora, V. Y. Postupalenko, V. V. Shvadchak, A. S. Klymchenko, Y. Mély, A. Burger and R. Benhida, *Tetrahedron*, 2009, **65**, 7809.

**g) Description of the vibrational bands obtained for the types *A*, *B*, *A<sub>trans</sub>* and *B'T* of 3-HC with one water**

**Table S4** Description of the strongest vibrational bands obtained for the *A*, *B*, *A<sub>trans</sub>* and *B'T* type of 3-hydroxychromone with one water molecule in the *S*<sub>0</sub> state (*cf.* Figure S2) (DFT/B3LYP/TZVP).

| <i>A</i><br>wavenumber / cm <sup>-1</sup>                 | Character                                                                         |
|-----------------------------------------------------------|-----------------------------------------------------------------------------------|
| 1435                                                      | O-H bend (3-HC), CH bend, C=C bend                                                |
| 1487                                                      | CH bend, ring deformation                                                         |
| 1597                                                      | O-H bend (H <sub>2</sub> O)                                                       |
| 1630                                                      | C-O stretch, C=C stretch, O-H bend (H <sub>2</sub> O), ring deformation, C-H bend |
| 1649                                                      | C-O stretch, C=C stretch, O-H bend, ring deformation, C-H bend                    |
| 3203                                                      | O-H stretch (3-HC)                                                                |
| 3424                                                      | Bonded O-H stretch (H <sub>2</sub> O)                                             |
| 3712                                                      | Free O-H stretch (H <sub>2</sub> O)                                               |
| <i>B</i><br>wavenumber / cm <sup>-1</sup>                 | Character                                                                         |
| 1445                                                      | O-H bend (3-HC), C-H bend, C=C bend                                               |
| 1489                                                      | C-H bend, ring deformation, C-O bend                                              |
| 1618                                                      | O-H bend (H <sub>2</sub> O)                                                       |
| 1630                                                      | C-O stretch, O-H bend (H <sub>2</sub> O), ring deformation, C-H bend              |
| 1644                                                      | C-O stretch, O-H bend (H <sub>2</sub> O), ring deformation, C-H bend              |
| 3494                                                      | O-H stretch (3-HC), O-H stretch (H <sub>2</sub> O)                                |
| 3499                                                      | O-H stretch (H <sub>2</sub> O), O-H stretch (3-HC)                                |
| 3718                                                      | Free O-H stretch (H <sub>2</sub> O)                                               |
| <i>A<sub>trans</sub></i><br>wavenumber / cm <sup>-1</sup> | Character                                                                         |
| 1486                                                      | O-H bend (3-HC), C-H bend, ring deformation                                       |
| 1602                                                      | O-H bend (H <sub>2</sub> O), C-O bend                                             |
| 1633                                                      | ring deformation, C-H bend                                                        |
| 1643                                                      | C-O stretch, O-H bend (3-HC), ring deformation, C-H bend, C=C stretch             |
| 1703                                                      | C-O stretch, ring deformation, C-H bend, O-H bend (3-HC)                          |
| 3439                                                      | O-H stretch (3-HC)                                                                |
| 3643                                                      | Sym. O-H stretch (H <sub>2</sub> O)                                               |
| 3742                                                      | Asym. O-H stretch (H <sub>2</sub> O)                                              |
| <i>B'T</i><br>wavenumber / cm <sup>-1</sup>               | Character                                                                         |
| 1435                                                      | O-H bend (3-HC), C-H bend, Ring deformation                                       |
| 1505                                                      | C-H bend, ring deformation, O-H bend                                              |
| 1567                                                      | C-O stretch, ring deformation, C-H bend, C=C stretch                              |
| 1596                                                      | O-H bend (3-HC), C-O stretch, ring deformation, C-H bend, C=C stretch             |
| 1636                                                      | O-H bend (H <sub>2</sub> O), ring deformation, C-H bend                           |
| 3126                                                      | O-H stretch (3-HC)                                                                |
| 3349                                                      | Bonded O-H stretch (H <sub>2</sub> O)                                             |
| 3720                                                      | Free O-H stretch (H <sub>2</sub> O)                                               |

### h) Resonance structures of the tautomeric structure of 3-HC

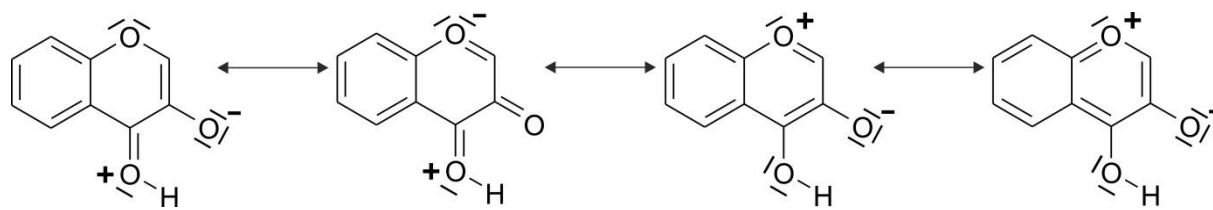

**Figure S8** Possible resonance structures of the tautomeric structure of 3-hydroxychromone.
